# Supplementary material
Source: Springer Nature journal article supplement (https://www.springermedizin.de/resource/supplementary/12891_2003_48_MOESM2_ESM.pdf/9510360)
Supplement: MOESM2 [file 9510360]

|                                                                        |
|------------------------------------------------------------------------|
| 1. Clearly stated aims                                                 |
| 2. Appropriateness of design to meet the aims                          |
| 3. Adequate specifications of subject group given                      |
| 4. Justification of sample size                                        |
| 5. Likelihood of reliable and valid measurements                       |
| 6. Sensitivity of outcome tool                                         |
| 7. Adequate description of statistical methods                         |
| 8. Adequate description of the data                                    |
| 9. Consistency in the number of subjects reported throughout the paper |
| 10. Assessment of statistical significance                             |
| 11. Attention to potential biases                                      |
| 12. Meaningful main findings                                           |
| 13. Interpretation of null findings                                    |
| 14. Interpretation of important effects                                |
| 15. Comparison of results with previous reports                        |
| 16. Implications in real life                                          |
